# Supplementary material for: Physiological and genomic evidence that selection on the transcription factor Epas1 has altered cardiovascular function in high-altitude deer mice
Source: PubMed Central journal article supplement (PMC6837288; doi:10.1371/journal.pgen.1008420), 2019-11-07
Supplement: pgen.1008420.s016.pdf [file pgen.1008420.s016.pdf]

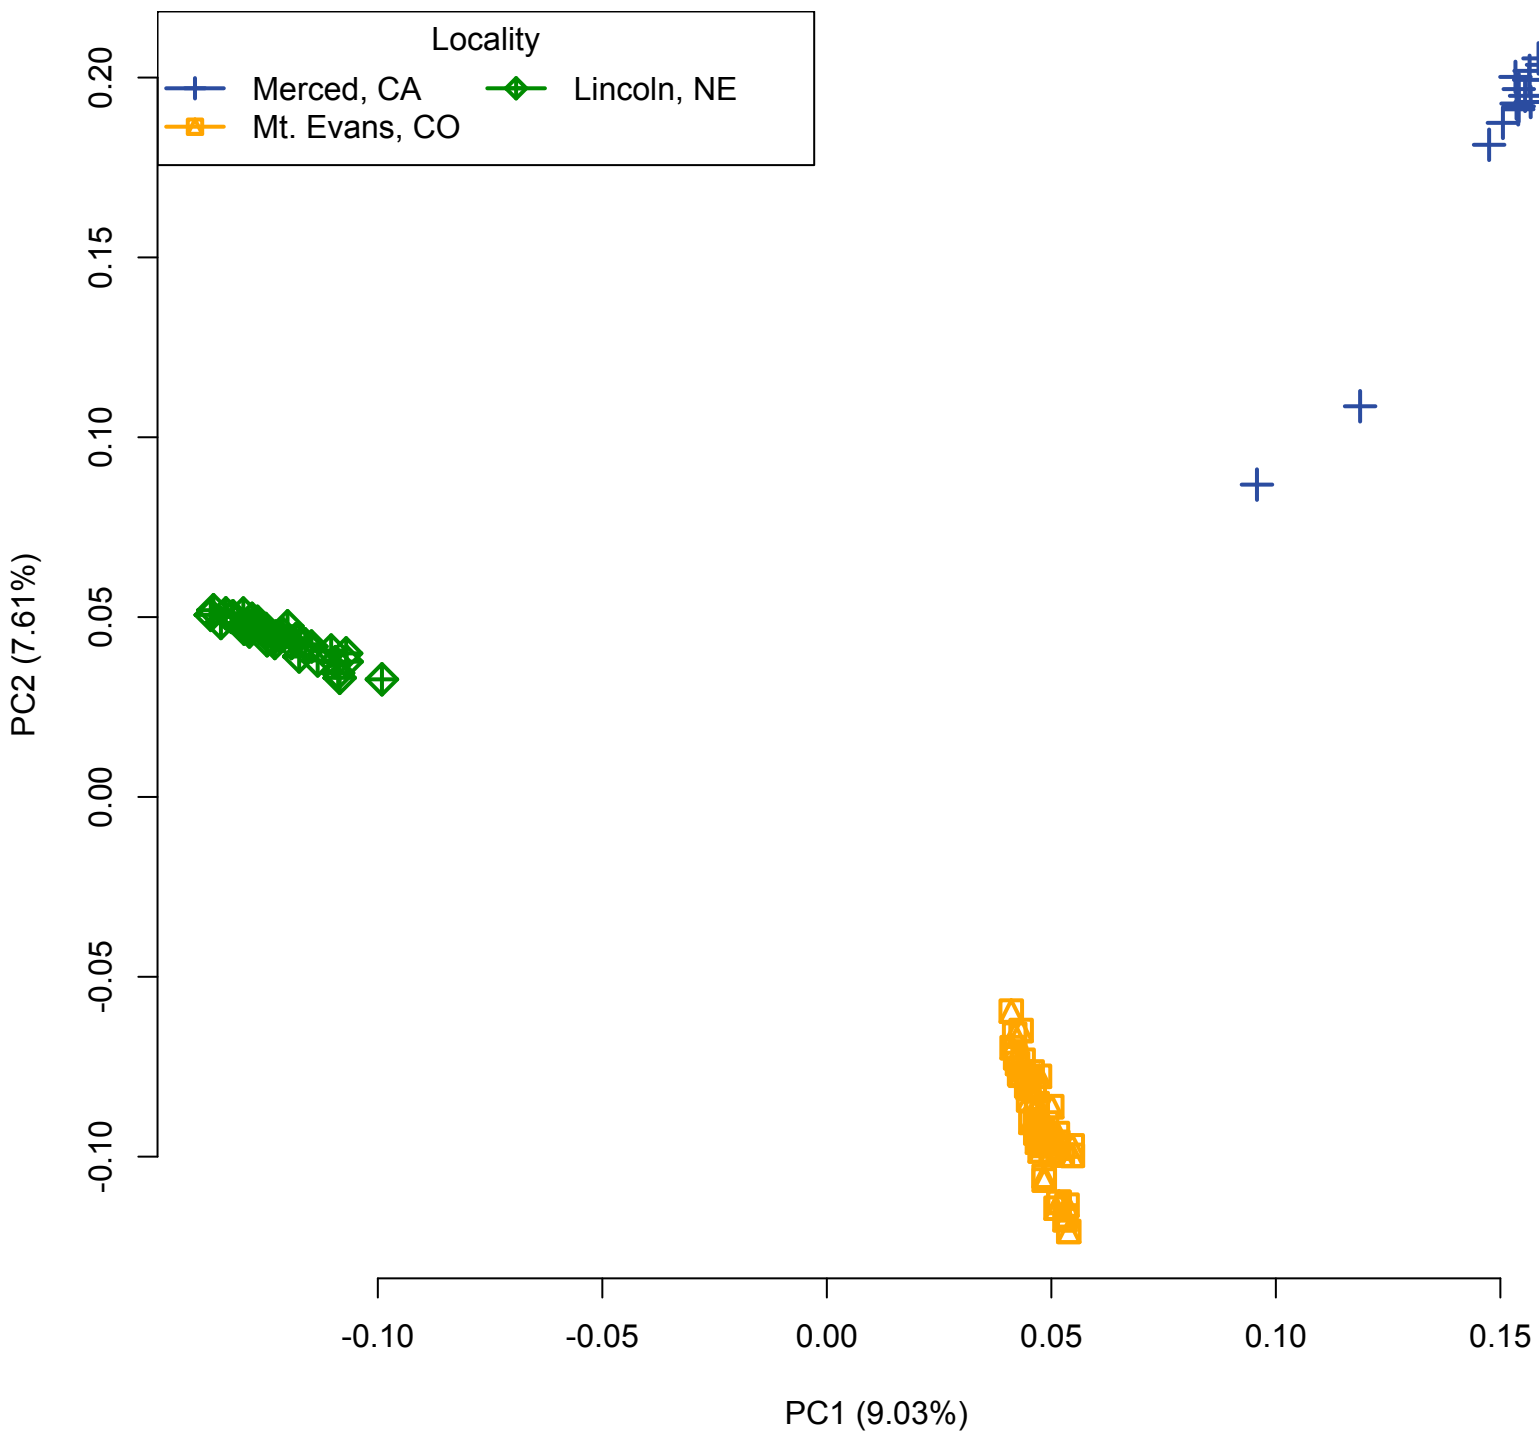

Figure S2. Principal components analysis of Mount Evans (n=48), Lincoln (n=37), and California (n=15) mice, based on genotypes from 296,196 exome-wide LD-pruned SNPs with no missing data.
