# Supplementary material for: Physiological and genomic evidence that selection on the transcription factor Epas1 has altered cardiovascular function in high-altitude deer mice
Source: PubMed Central journal article supplement (PMC6837288; doi:10.1371/journal.pgen.1008420), 2019-11-07
Supplement: pgen.1008420.s019.pdf [file pgen.1008420.s019.pdf]

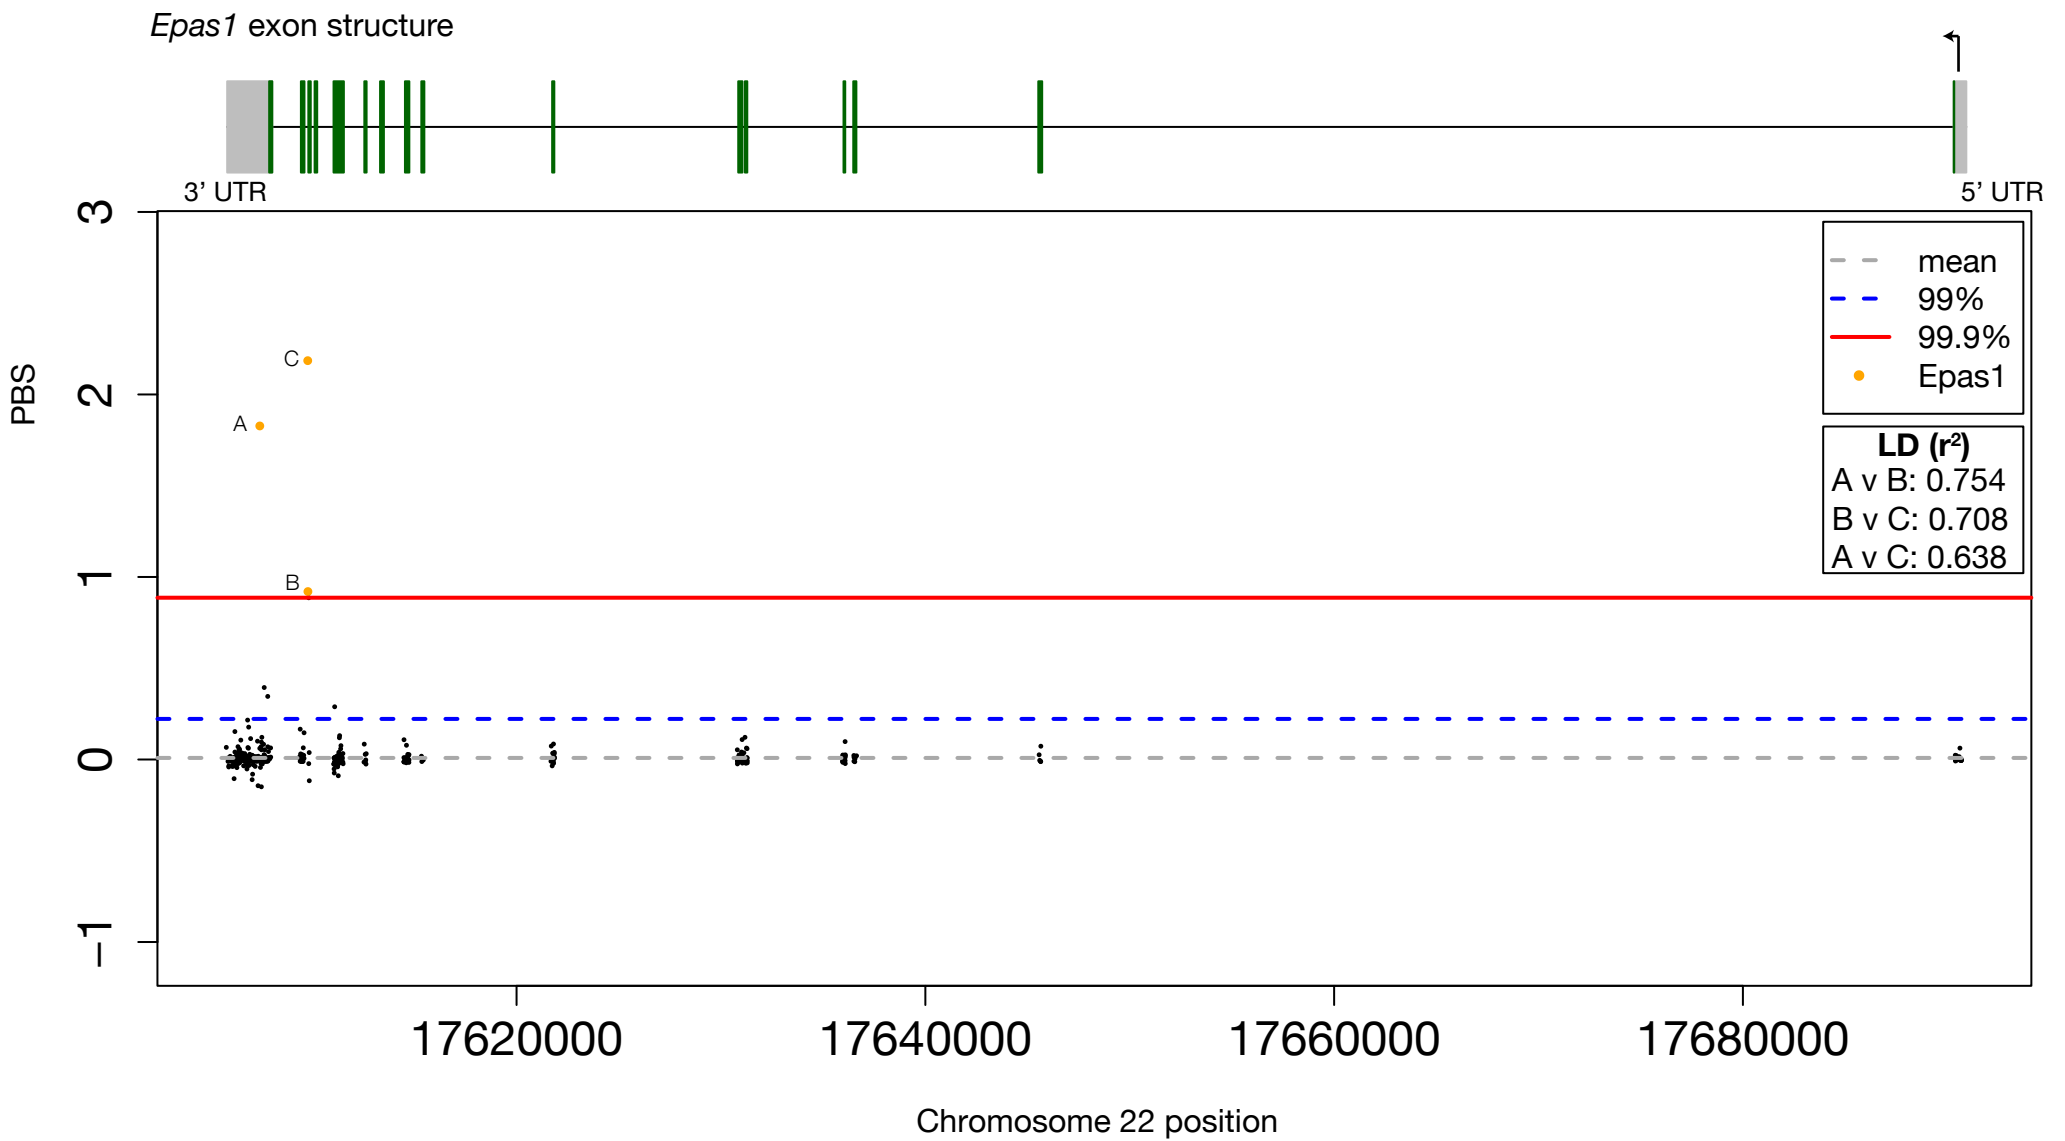

Figure S5. Manhattan plot of PBS values for all SNPs (black dots) located within all exons of *Epas1*. Exome-wide values for mean, 99%, and 99.9% percentile PBS values are shown, and three outlier SNPs above the 99.9th percentile located in *Epas1* are highlighted in orange. Pairwise linkage disequilibrium estimates (measured with the squared correlation coefficient,  $r^2$ ) for each SNP pair are provided.
