# Supplementary material for: Physiological and genomic evidence that selection on the transcription factor Epas1 has altered cardiovascular function in high-altitude deer mice
Source: PubMed Central journal article supplement (PMC6837288; doi:10.1371/journal.pgen.1008420), 2019-11-07
Supplement: pgen.1008420.s020.pdf [file pgen.1008420.s020.pdf]

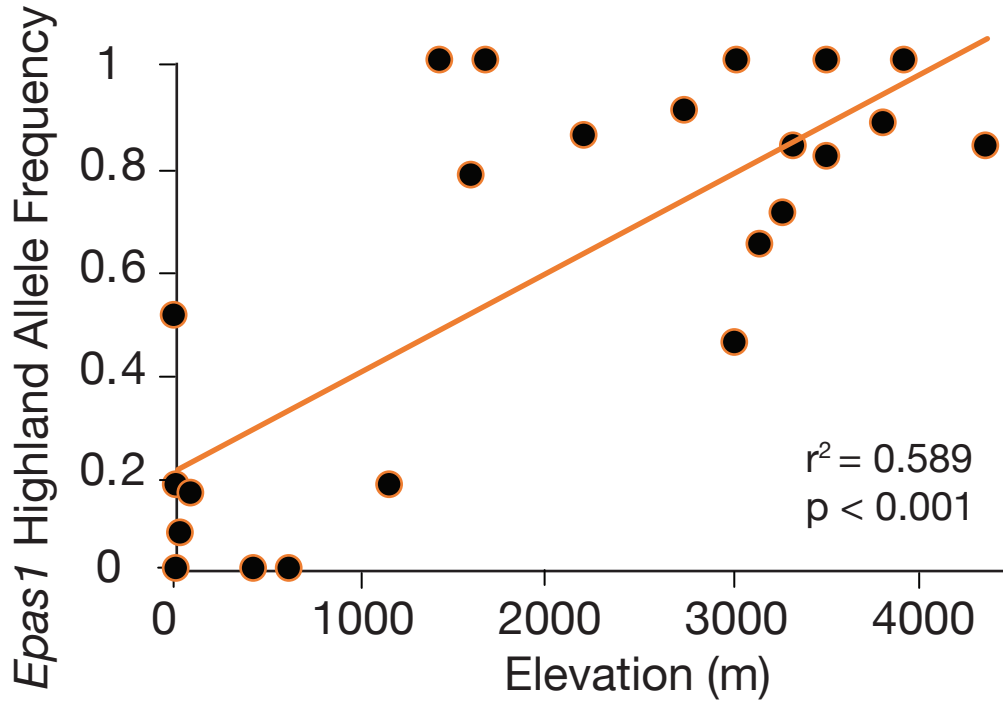

Figure S6. Significant positive correlation of high-elevation allele frequency with sampled elevation, based on genotyping 23 populations.
