# Supplementary material for: Physiological and genomic evidence that selection on the transcription factor Epas1 has altered cardiovascular function in high-altitude deer mice
Source: PubMed Central journal article supplement (PMC6837288; doi:10.1371/journal.pgen.1008420), 2019-11-07
Supplement: pgen.1008420.s023.pdf [file pgen.1008420.s023.pdf]

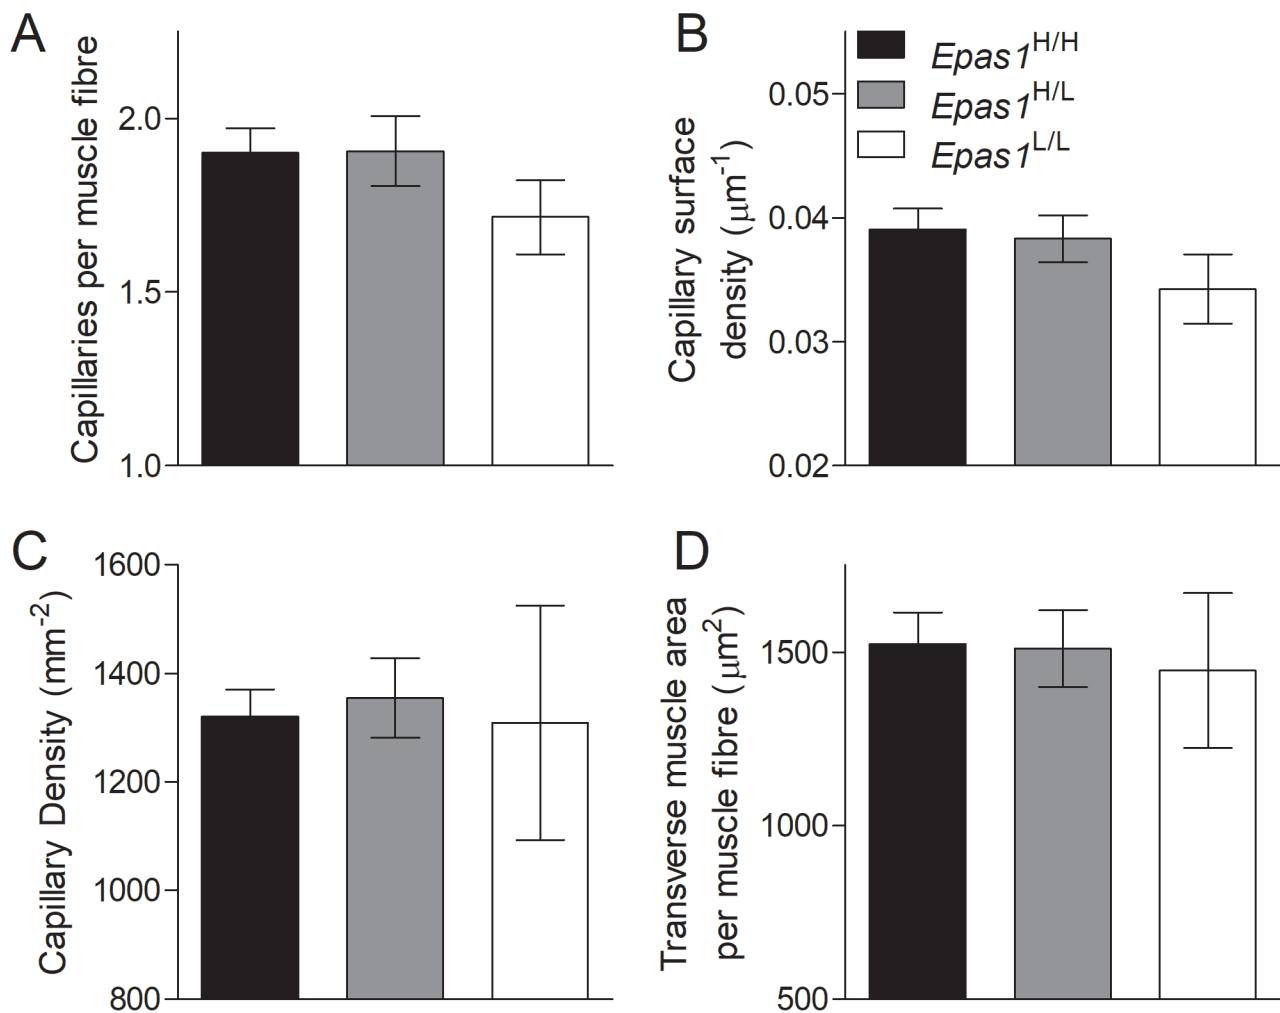

Figure S9. There were no differences in capillarity in the gastrocnemius muscle between deer mice with different *Epas1* genotypes. Capillarity was quantified using the following measurements: A) capillaries per muscle fiber, B) capillary surface density, C) capillary density, and D) transverse muscle area per muscle fiber. Sample sizes:  $n=16$  *Epas1*<sup>H/H</sup>,  $n=13$  *Epas1*<sup>H/L</sup>, and  $n=4$  *Epas1*<sup>L/L</sup> variants.
