# Supplementary material for: Physiological and genomic evidence that selection on the transcription factor Epas1 has altered cardiovascular function in high-altitude deer mice
Source: PubMed Central journal article supplement (PMC6837288; doi:10.1371/journal.pgen.1008420), 2019-11-07
Supplement: pgen.1008420.s024.pdf [file pgen.1008420.s024.pdf]

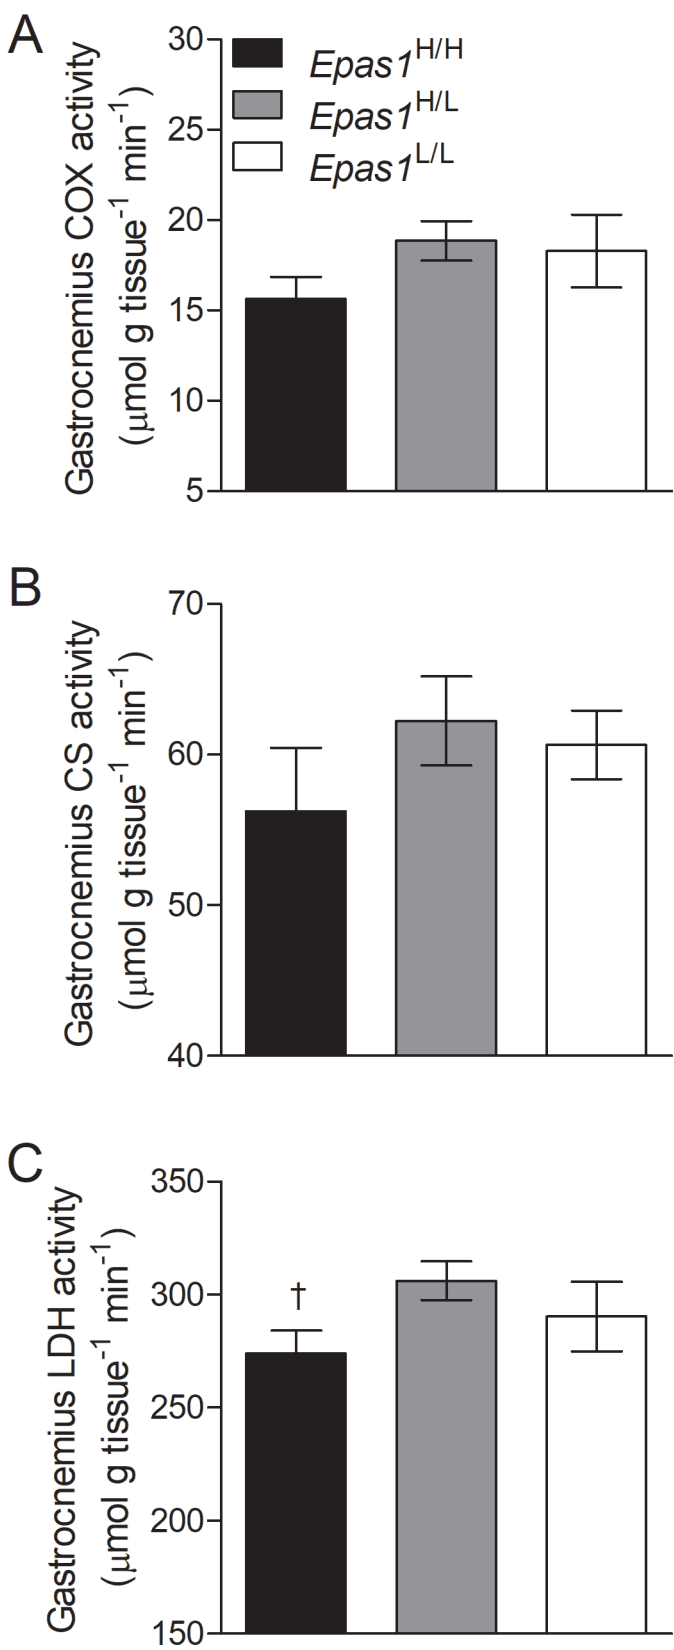

Figure S10. The activities of oxidative enzymes, i.e. A) cytochrome c oxidase, (COX) and B) citrate synthase (CS) in the gastrocnemius muscle were similar between deer mice with different *Epas1* genotypes, but C) lactate dehydrogenase (LDH) activity appeared to be lower in mice that were homozygous for the highland *Epas1* variant. † Significant difference in a post-hoc comparison between only *Epas1*<sup>H/H</sup> and *Epas1*<sup>H/L</sup> genotypes. n=16 *Epas1*<sup>H/H</sup>, n=13 *Epas1*<sup>H/L</sup>, and n=4 *Epas1*<sup>L/L</sup> variants.
