# Supplementary material for: Physiological and genomic evidence that selection on the transcription factor Epas1 has altered cardiovascular function in high-altitude deer mice
Source: PubMed Central journal article supplement (PMC6837288; doi:10.1371/journal.pgen.1008420), 2019-11-07
Supplement: pgen.1008420.s026.pdf [file pgen.1008420.s026.pdf]

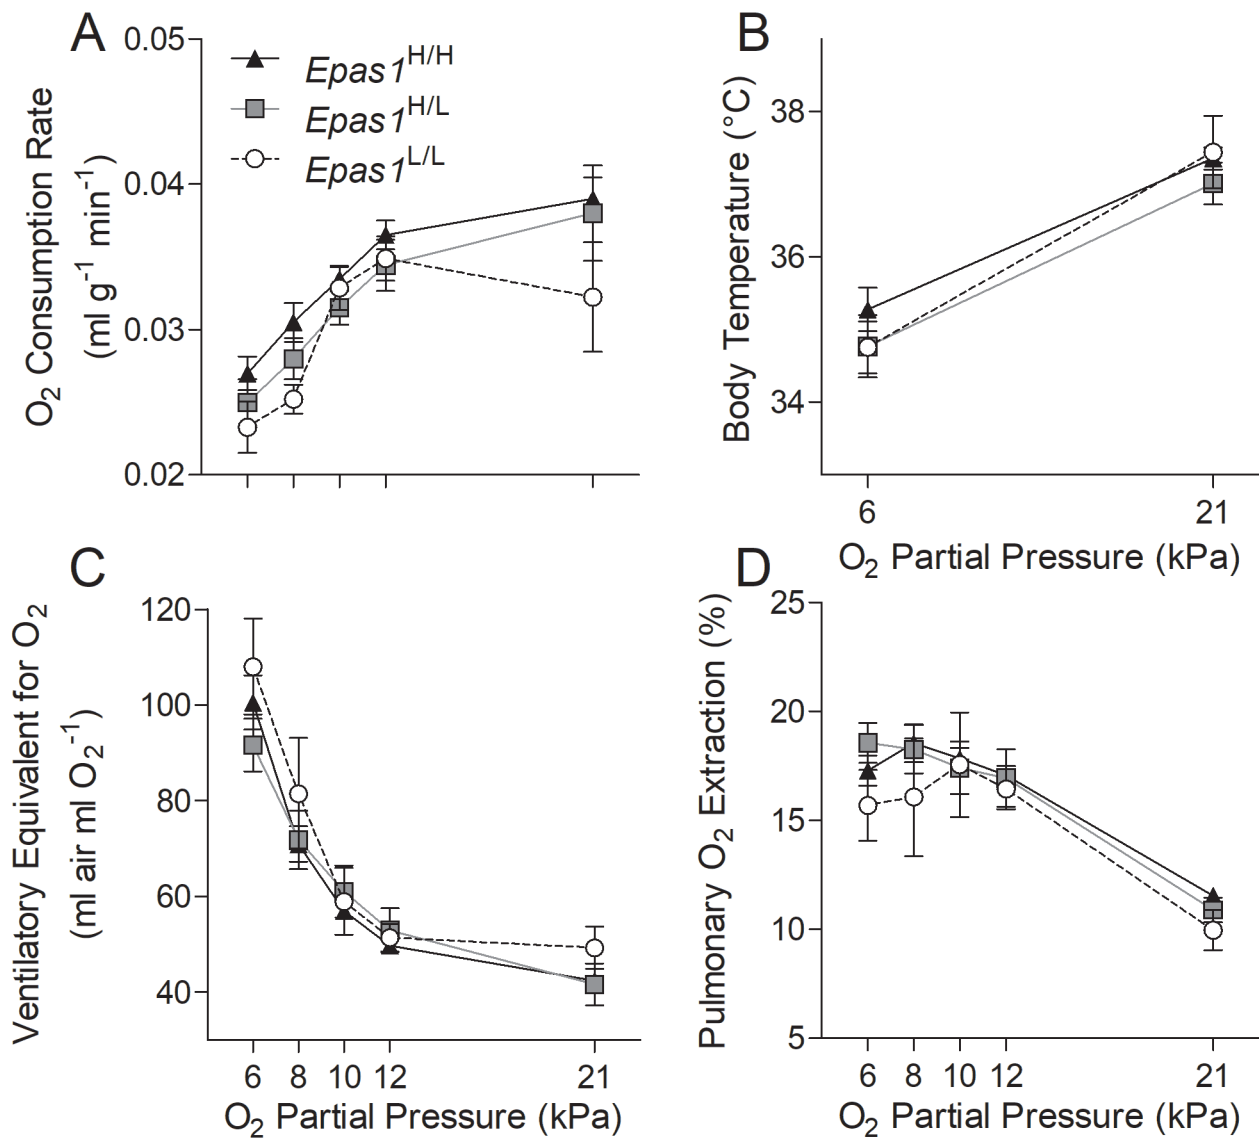

Figure S12. Deer mice with different *Epas1* genotypes exhibited similar declines in A) O<sub>2</sub> consumption rate and B) body temperature in response to increasingly severe levels of acute hypoxia, and similar increases in C) ventilatory equivalent for O<sub>2</sub> and D) pulmonary O<sub>2</sub> extraction. Sample sizes: n=26 *Epas1*<sup>H/H</sup>, n=13 *Epas1*<sup>H/L</sup>, and n=4 *Epas1*<sup>L/L</sup> variants.
