# Supplementary material for: Physiological and genomic evidence that selection on the transcription factor Epas1 has altered cardiovascular function in high-altitude deer mice
Source: PubMed Central journal article supplement (PMC6837288; doi:10.1371/journal.pgen.1008420), 2019-11-07
Supplement: pgen.1008420.s027.pdf [file pgen.1008420.s027.pdf]

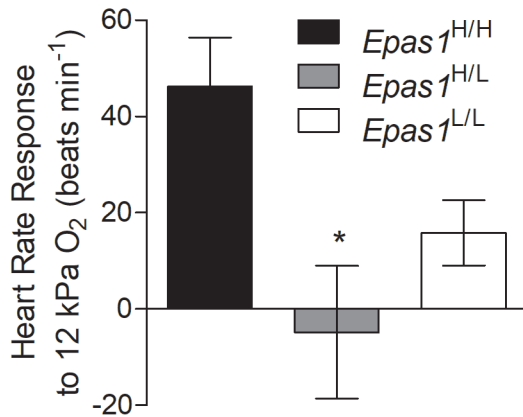

Figure S13. Deer mice that were homozygous for the highland *Epas1* variant exhibited a significantly greater increase in heart rate from normoxia (21 kPa O<sub>2</sub>) to environmentally realistic levels of hypoxia at 4300 m elevation (12 kPa O<sub>2</sub>). Measurements were made using a MouseOx Plus collar. \* A significant pairwise difference between *Epas1*<sup>H/H</sup> and *Epas1*<sup>H/L</sup> mice. n=26 *Epas1*<sup>H/H</sup>, n=13 *Epas1*<sup>H/L</sup>, and n=4 *Epas1*<sup>L/L</sup> variants.
