# Supplementary material for: Physiological and genomic evidence that selection on the transcription factor Epas1 has altered cardiovascular function in high-altitude deer mice
Source: PLoS Genet. 2019 Nov 7;15(11):e1008420. doi: 10.1371/journal.pgen.1008420 (PMC6837288; doi:10.1371/journal.pgen.1008420)
Supplement: S13 Table — Primers were used to amplify Epas1 prior to restriction enzyme digest for screening of alternative alleles. Sequences are given 5' to 3'. See supplemental text for PCR reaction conditions. (XLSX) [file pgen.1008420.s014.xlsx]

## Sheet: Sheet1
Table S13. Epas1 primer sequences. Primers were used to amplify Epas1 prior to restriction enzyme digest for screening of alternative alleles. Sequences are given 5' to 3'
Primer	Sequence
epas1_snp_L	GCACGCCTTCCAAGACAC
epas1_snp_R	GGTGGCAGGTGTCTCAGT
epas1_set1_F	AGGGCAGAGATGTAAACAGC
epas1_set1_R	GAATGTGGTGCCGTCTGATG
